# Supplementary material for: Validation of the FACETS-OF-PPC as an Outcome Measure for Children with Severe Neurological Impairment and Their Families—A Multicenter Prospective Longitudinal Study
Source: MDPI journal article supplement (doi:10.3390/children8100905), 2021-10-11
Supplement: s1 [file s1]

## **FACETS-OF-PPC Scales and Corresponding Items**

### **Original Model**

| <b>Scale</b>                 | <b>Items</b>                                  |
|------------------------------|-----------------------------------------------|
| Symptoms                     | B1 + B2 + B3 + B4 + B5 + B6 + B7 + C10        |
| Child's social participation | A3 + A4 + C1 + C2                             |
| Normalcy                     | C4 + C5 + C6 + C8 + C11 + C12                 |
| Social support               | C3 + C7 + C9                                  |
| Coping with the disease      | A5 + A10 + A13 + A14                          |
| Caregiver's competencies     | A1 + A2 + A6 + A7 + A8 + A9 + A11 + A12 + A15 |

### **Revised Model 1**

| <b>Scale</b>                 | <b>Items</b>                                  |
|------------------------------|-----------------------------------------------|
| Child's social participation | A3 + A4 + C1 + C2                             |
| Normalcy                     | C4 + C5 + C6 + C8 + C11 + C12                 |
| Social support               | C3 + C7 + C9                                  |
| Coping with the disease      | A5 + A10 + A13 + A14                          |
| Caregiver's competencies     | A1 + A2 + A6 + A7 + A8 + A9 + A11 + A12 + A15 |

### **Revised Model 2**

| <b>Scale</b>                 | <b>Items</b>            |
|------------------------------|-------------------------|
| Child's social participation | A3 + A4 + C1            |
| Normalcy                     | C4 + C5 + C6 + C8 + C12 |
| Social support               | C3 + C7 + C9            |
| Coping with the disease      | A5 + A10 + A14          |
| Caregiver's competencies     | A6 + A7 + A8            |

### **Item Deletions**

| <b>Step</b> | <b>Item</b>   | <b>Scale deleted from</b>    |
|-------------|---------------|------------------------------|
| 1           | All B and C10 | Symptoms                     |
| 2           | A13           | Coping with the disease      |
| 3           | C2            | Child's social participation |
| 4           | A15           | Caregiver's competencies     |
| 5           | C11           | Normalcy                     |
| 6           | A2            | Caregiver's competencies     |
| 7           | A12           | Caregiver's competencies     |
| 8           | A11           | Caregiver's competencies     |
| 9           | A9            | Caregiver's competencies     |
